# Supplementary material
Source: ML conference proceedings conference paper supplement (https://proceedings.neurips.cc/paper_files/paper/2019/hash/f63f65b503e22cb970527f23c9ad7db1-Abstract.html)
Supplement: Supplementary file [file f63f65b503e22cb970527f23c9ad7db1-Supplemental.zip]

# Appendices

## A Model Hyperparameters

Table 5: Hyperparameters of Transformer TTS and FastSpeech. Encoder and Decoder are for Transformer TTS, Phoneme-Side and Mel-Side FFT are for FastSpeech.

| Hyperparameter                              | Transformer TTS | FastSpeech      |
|---------------------------------------------|-----------------|-----------------|
| Phoneme Embedding Dimension                 | 512             | 384             |
| Encoder/Phoneme-Side FFT Layers             | 6               | 6               |
| Encoder/Phoneme-Side FFT Hidden             | 512             | 384             |
| Encoder/Phoneme-Side FFT Conv1D Kernel      | 1               | 3               |
| Encoder/Phoneme-Side FFT Conv1D Filter Size | 1024            | 1536            |
| Encoder/Phoneme-Side FFT Attention Heads    | 8               | 2               |
| Decoder/Mel-Side FFT Layers                 | 6               | 6               |
| Decoder/Mel-Side FFT Hidden                 | 512             | 384             |
| Decoder/Mel-Side FFT Conv1D Kernel          | 1               | 3               |
| Decoder/Mel-Side FFT Conv1D Filter Size     | 1024            | 1536            |
| Decoder/Mel-Side FFT Attention Headers      | 8               | 2               |
| Duration Predictor Conv1D Kernel            | /               | 3               |
| Duration Predictor Conv1D Filter Size       | /               | 256             |
| Dropout                                     | 0.1             | 0.1             |
| Batch Size                                  | 64 (16 * 4GPUs) | 64 (16 * 4GPUs) |
| Total Number of Parameters                  | 33.8M           | 30.1M           |

## B 50 Particularly Hard Sentences

The 50 particularly hard sentences mentioned in Section 5 are listed below:

01. a
02. b
03. c
04. H
05. I
06. J
07. K
08. L
09. 22222222 hello 22222222
10. S D S D Pass zero - zero Fail - zero to zero - zero - zero Cancelled - fifty nine to three - two - sixty four Total - fifty nine to three - two -
11. S D S D Pass - zero - zero - zero - zero Fail - zero - zero - zero - zero Cancelled - four hundred and sixteen - seventy six -
12. zero - one - one - two Cancelled - zero - zero - zero - zero Total - two hundred and eighty six - nineteen - seven -
13. forty one to five three hundred and eleven Fail - one - one to zero two Cancelled - zero - zero to zero zero Total -
14. zero zero one , MS03 - zero twenty five , MS03 - zero thirty two , MS03 - zero thirty nine ,
15. 1b204928 zero one seven ole32
16. zero zero zero zero zero zero zero zero two seven nine eight F three forty zero zero zero zero zero six four two eight zero one eight
17. c five eight zero three three nine a zero bf eight FALSE zero zero zero bba3add2 - c229 - 4cdb -

380 18. Calendaring agent failed with error code 0x80070005 while saving appointment .  
381 19. Exit process - break ld - Load module - output ud - Unload module - ignore ser - System error -  
382 ignore ibp - Initial breakpoint -  
383 20. Common DB connectors include the DB - nine , DB - fifteen , DB - nineteen , DB - twenty five ,  
384 DB - thirty seven , and DB - fifty connectors .  
385 21. To deliver interfaces that are significantly better suited to create and process RFC eight twenty  
386 one , RFC eight twenty two , RFC nine seventy seven , and MIME content .  
387 22. int1 , int2 , int3 , int4 , int5 , int6 , int7 , int8 , int9 ,  
388 23. seven \_ ctl00 ctl04 ctl01 ctl00 ctl00  
389 24. Http0XX , Http1XX , Http2XX , Http3XX ,  
390 25. config file must contain A , B , C , D , E , F , and G .  
391 26. mondo - debug mondo - ship motif - debug motif - ship sts - debug sts - ship Comparing local  
392 files to checkpoint files ...  
393 27. Rusbvts . dll Dsaccessbvts . dll Exchmembvt . dll Draino . dll Im trying to deploy a new topology  
394 , and I keep getting this error .  
395 28. You can call me directly at four two five seven zero three seven three four four or my cell four two  
396 five four four seven four seven four or send me a meeting request with all the appropriate  
397 information .  
398 29. Failed zero point zero zero percent < one zero zero one zero zero zero zero Internal . Exchange .  
399 ContentFilter . BVT ContentFilter . BVT\_log . xml Error ! Filename not specified .  
400 30. C colon backslash o one two f c p a r t y backslash d e v one two backslash oasis backslash  
401 legacy backslash web backslash HELP  
402 31. src backslash mapi backslash t n e f d e c dot c dot o l d backslash backslash m o z a r t f one  
403 backslash e x five  
404 32. copy backslash backslash j o h n f a n four backslash scratch backslash M i c r o s o f t dot S h a r  
405 e P o i n t dot  
406 33. Take a look at h t t p colon slash slash w w w dot granite dot a b dot c a slash access slash email  
407 dot  
408 34. backslash bin backslash premium backslash forms backslash r e g i o n a l o p t i o n s dot a s p x  
409 dot c s Raj , DJ ,  
410 35. Anuraag backslash backslash r a d u r five backslash d e b u g dot one eight zero nine underscore  
411 P R two h dot s t s contains  
412 36. p l a t f o r m right bracket backslash left bracket f l a v o r right bracket backslash s e t u p dot e x  
413 e  
414 37. backslash x eight six backslash Ship backslash zero backslash A d d r e s s B o o k dot C o n t a c  
415 t s A d d r e s  
416 38. Mine is here backslash backslash g a b e h a l l hyphen m o t h r a backslash S v r underscore O f  
417 f i c e s v r  
418 39. h t t p colon slash slash teams slash sites slash T A G slash default dot aspx As always , any  
419 feedback , comments ,  
420 40. two thousand and five h t t p colon slash slash news dot com dot com slash i slash n e slash f d  
421 slash two zero zero three slash f d  
422 41. backslash i n t e r n a l dot e x c h a n g e dot m a n a g e m e n t dot s y s t e m m a n a g e  
423 42. I think Rich's post highlights that we could have been more strategic about how the sum total of  
424 XBOX three hundred and sixtys were distributed .  
425 43. 64X64 , 8K , one hundred and eighty four ASSEMBLY , DIGITAL VIDEO DISK DRIVE ,  
426 INTERNAL , 8X ,  
427 44. So we are back to Extended MAPI and C++ because . Extended MAPI does not have a dual  
428 interface VB or VB .Net can read .  
429 45. Thanks , Borge Trongmo Hi gurus , Could you help us E2K ASP guys with the following issue ?  
430 46. Thanks J RGR Are you using the LDDM driver for this system or the in the build XDDM driver ?  
431 47. Btw , you might remember me from our discussion about OWA automation and OWA readiness  
432 day a year ago .

- 433 48. empidtool . exe creates HKEY\_CURRENT\_USER Software Microsoft Office Common  
434 QMPersNum in the registry , queries AD , and the populate the registry with MS employment ID  
435 if available else an error code is logged .
- 436 49. Thursday, via a joint press release and Microsoft AI Blog, we will announce Microsoft's  
437 continued partnership with Shell leveraging cloud, AI, and collaboration technology to drive  
438 industry innovation and transformation.
- 439 50. Actress Fan Bingbing attends the screening of 'Ash Is Purest White (Jiang Hu Er Nv)' during the  
440 71st annual Cannes Film Festival
